# Supplementary material for: A Flexible ROMS-based Hybrid Coupled Model for ENSO Studies–Model Formulation and Performance Evaluation
Source: Copernicus journal article supplement (doi:10.5194/gmd-2024-187), 2024-12-10
Supplement: Supplementary file [file gmd-2024-187-AC2-supplement.pdf]

**Response to Reviewers**  
**Manuscript ID gmd-2024-187**

**Responses to the Comments of Reviewer**

**Reviewer #2:**

*The work built a hybrid coupled model based on ROMS and a statistical atmosphere. The paper specifically present the model formulation and its performance evaluations about ENSO. Overall, the work is interesting. The developed model will be a useful for future ENSO studies.*

**Our response:** We thank the reviewer for the suggestions (in italic black). We have revised the manuscript based on these suggestions and comments. Below are our point-by-point responses to the reviewer's comments (in blue).

*Table 1: I can't understand how your "complexity" is defined, as well as your degree of freedom? The definition of "variables" for dynamical models is different from that for AI. Your rating/table is misleading, and gives one a feeling that the AI models are much more complex than the CGCMs.*

**Our response:** Since 'complexity' is not discussed in the paper and may be misleading, we have removed it from Table 1.

*Fig. 1/L121: Not sure how the first SVD modes are derived? SVD needs to be performed by a pair of fields. Please explain how the three fields are used?*

**Our response:** Due to the first SVD mode of  $SST_{inter}$  is similar in the  $SST_{inter} - \tau_{inter}$  and  $SST_{inter} - FWF_{inter}$  pairings, we only present the result from the  $SST_{inter} - \tau_{inter}$  pairing in Fig.2a. We have included a description of this in Lines 120–122 as: "We note that since the first SVD mode of  $SST_{inter}$  in the  $SST_{inter} - \tau_{inter}$  and  $SST_{inter} - FWF_{inter}$  pairings is similar, only the first SVD mode of  $SST_{inter}$  from the  $SST_{inter} - \tau_{inter}$  pairing is shown in Fig. 2a."

*Fig. 9/10: The simulated ENSO cycles are too regular. One suggestion for your future experiments is to add some state-depend noise to your statistical atmospheric model.*

**Our response:** Thanks for the suggestion. Previous studies such as Zhang et al., 2008 have shown that stochastic atmospheric forcing plays an important role in the irregularity of ENSO. In our future work, we will incorporate a stochastic forcing module into the HCM<sub>ROMS</sub> to reproduce the state-depend noise process.

Reference: Zhang, R.-H., Busalacchi, A. J., and DeWitt, D. G.: The Roles of Atmospheric Stochastic Forcing (SF) and Oceanic Entrainment Temperature (Te) in Decadal Modulation of ENSO, J. Clim., 21, 674–704, <https://doi.org/10.1175/2007JCLI1665.1>, 2008.

*Fig. 14(e-h): Are you presenting streamlines in the figures? If so, are they derived based on mean currents?*

**Our response:** The streamlines are derived from the mean background currents. We have added a description in Fig. 14 as: "The streamlines in (e-h) represent the averaged flow field during the budget calculation."

L471: eastward advection anomalous => anomalous eastward advection;

**Our response:** changed

*Also, the statements are at least incomplete. The vertical advection of anomalous warm water by mean upwelling is important contributor to the onset of El Ninos. The subsurface warming is also related to the westerly wind anomalies through their triggered downwelling Kelvin waves.*

**Our response:** We agree that the vertical advection of anomalous warm water by mean upwelling is an important contributor to the onset of El Niño. Due to the horizontal and vertical advections are coupled on a monthly time scale and their effects are largely canceled by each other, we did not separate the horizontal and vertical advection individually and only discussed the total advection effect. The effects of downwelling Kelvin waves triggered by westerly wind anomalies are included in the total advection effect. We have address this in Lines 445-446 as:

“The total advection term  $T_{adv}$  includes both horizontal processes, e.g., the influence of the equatorial currents, and vertical processes, e.g., the downwelling Kelvin waves triggered by the westerly wind anomalies.”
