# Supplementary material for: A Flexible ROMS-based Hybrid Coupled Model for ENSO Studies–Model Formulation and Performance Evaluation
Source: Copernicus journal article supplement (doi:10.5194/gmd-2024-187), 2024-12-10
Supplement: Supplementary file [file gmd-2024-187-RC1-supplement.pdf]

## Recommendation: Accept after Minor Revisions

### Overall Evaluation

This article presents a novel Hybrid Coupled Model (HCM<sub>ROMS</sub>) based on the Regional Ocean Modeling System (ROMS) for studying the El Niño-Southern Oscillation (ENSO). The authors provide a detailed description of the model's formulation and evaluate its performance in simulating ENSO-related phenomena. The research is well-conducted, with clear objectives, robust methodology, and comprehensive analysis. The results demonstrate the model's capability to simulate ENSO cycles and associated three-dimensional temperature anomalies, making it a valuable tool for future ENSO research.

1. **P5, Line 108:** "and  $U_m$  and  $V_m$  are calculated time series of left field and left field in the statistical model", the second "left field" should be changed to "right field"?
2. **P11, Line 228:** We adopt ERSST in this subsection instead of using the NOAA OI SST, "OI SST" => "OISST"
3. **P18, Line 372, 374:** "It shows that the leading EOF (Mode 1)", "The second EOF (Mode 2)". The first and second EOFs have been defined as Mode 1 and Mode 2, respectively, so, please ensure consistency in terminology throughout the subsequent text.
4. **P18, Line 397:** "phase vectors are in the third quadrant" => "the fourth quadrant"
5. **P18, Line 399:** "phase vectors are in the fourth quadrant" => "the third quadrant"
6. **P19, Line 406:** "Vectors at the bottom right of (a-b, d-e) show", "d-e" should be changed to "d-g"?
7. **P22, Line 457:** "where [\*] denotes the interannual operator", the symbol \* is not found in Eq. 5
8. **P23, Line 481:** "both advection and vertical diffusion effects play constructive roles in shaping the dipole-type temperature changes (Figs. 14b).", Figs. 14b => Figs. 14b, f, and j

**9. P23:** The streamlines in Fig 14 need some description.

**10. P24, Line 535:** "The distinct functions of Mode2 explain the asymmetry between",  
Mode2 => Mode 2
